# Supplementary material for: Aromatic C-nitrosation by a copper(ii)–nitrosyl complex
Source: Royal Society of Chemistry journal article supplement (doi:10.1039/c4dt02689f), 2014-11-19
Supplement: c4dt02689f1.pdf [file c4dt02689f1.pdf]

**Supporting Information**

for

**Aromatic C-nitrosation by a Copper(II)-nitrosyl complex**

Kanhu Charan Rout, Biplab Mondal\*

*Department of Chemistry, Indian Institute of Technology Guwahati, Assam 781039, India*

*E-mail: [biplab@iitg.ernet.in](mailto:biplab@iitg.ernet.in)*

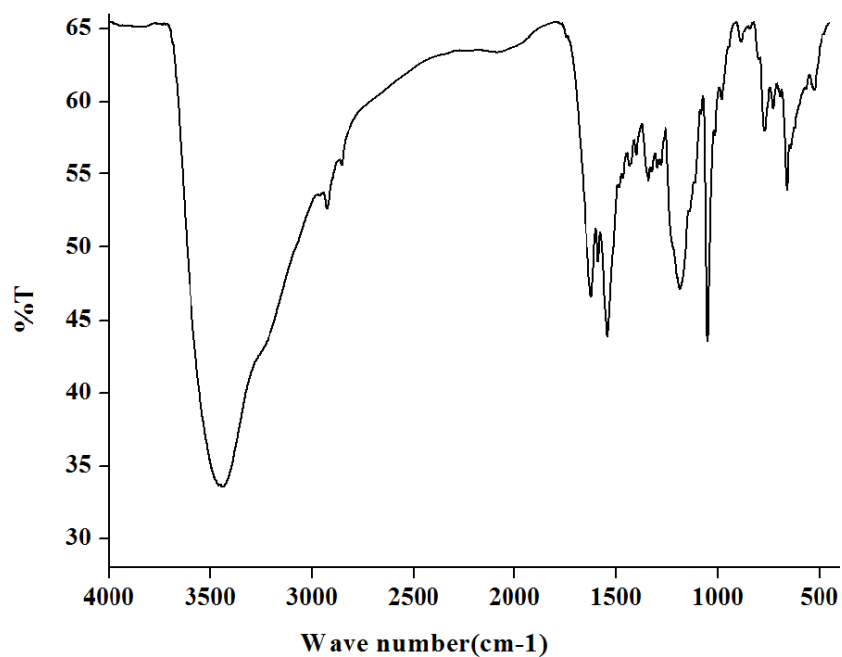

Figure S1. FT-IR spectrum of complex **1** in KBr pallet.

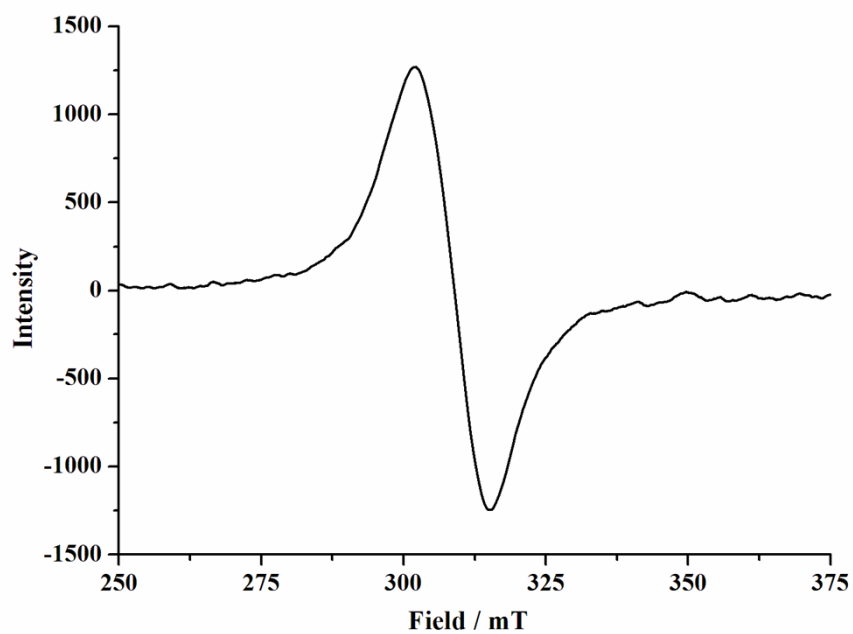

Figure S2. X-Band EPR spectrum of complex **1** in methanol at room temperature.

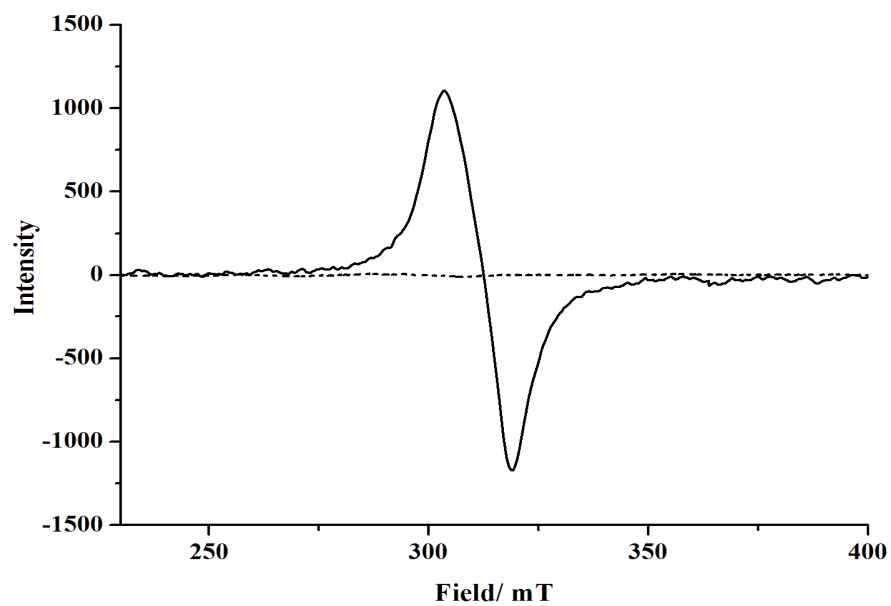

**Figure S3.** X-Band EPR spectra of complex **1** before (solid line) and after (dotted line) purging nitric oxide in methanol.

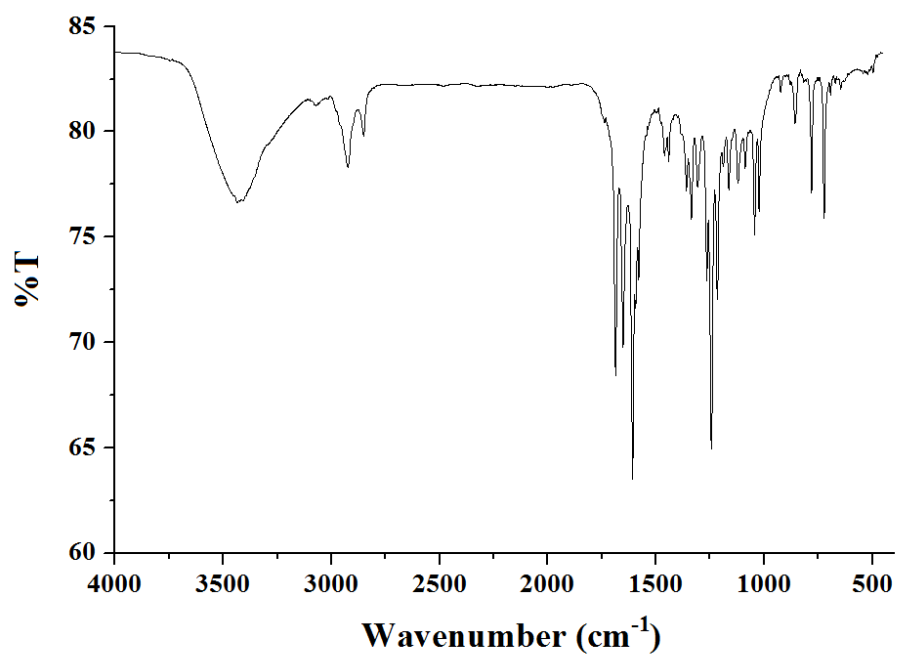

**Figure S4.** FT-IR spectrum of L' in KBr pellet.

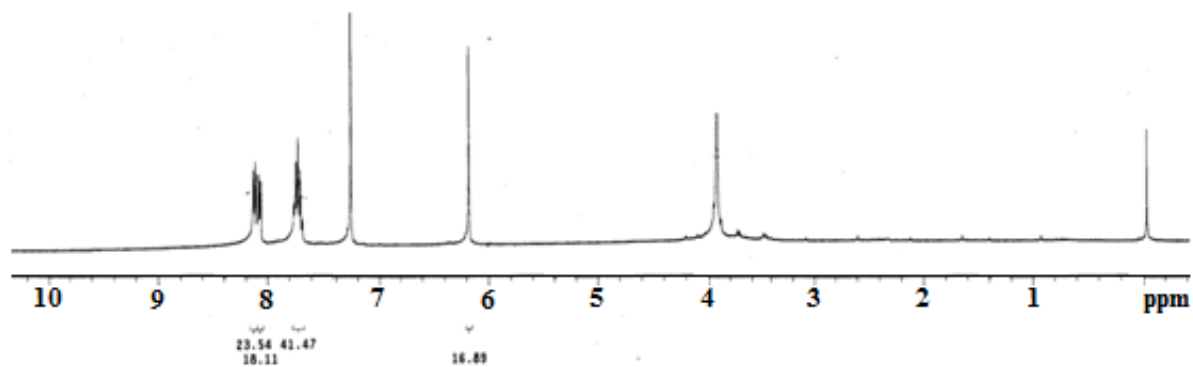

Figure S5.  $^1\text{H-NMR}$  spectrum of  $\text{L}'$  in  $\text{CDCl}_3$ .

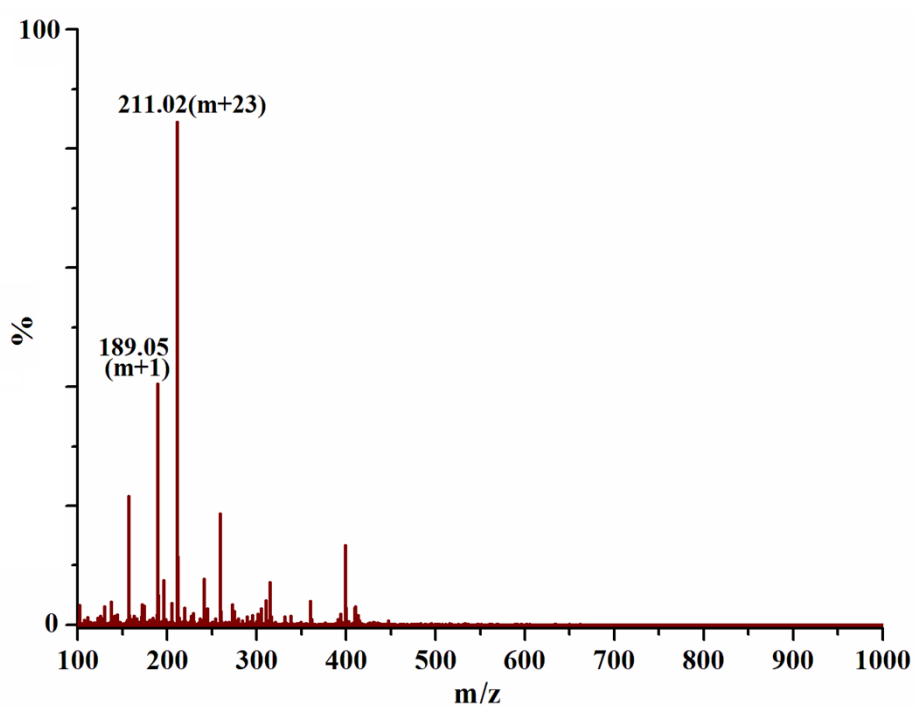

Figure S6. ESI mass spectrum of  $\text{L}'$  in methanol.

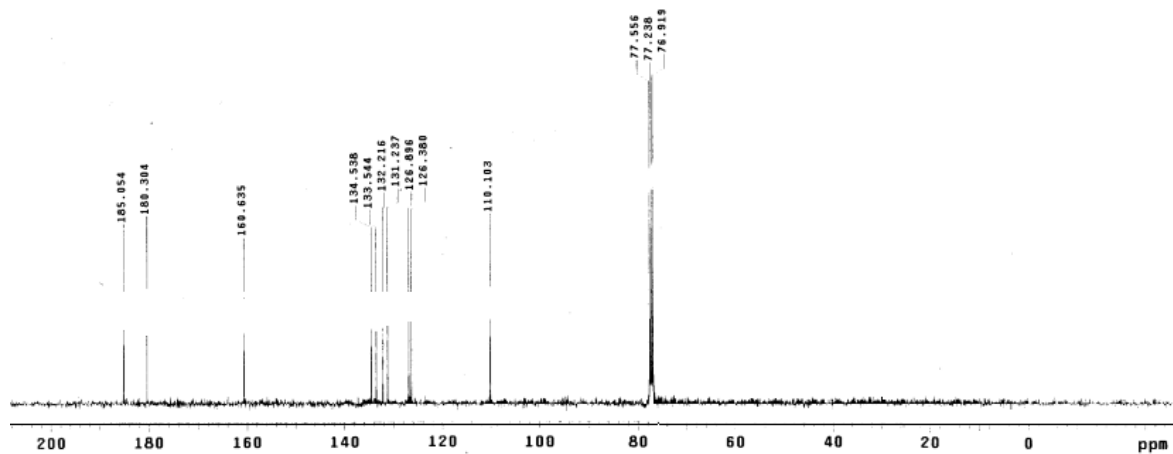

Figure S7.  $^{13}\text{C}$ -NMR spectrum of  $L$  in  $\text{CDCl}_3$ .

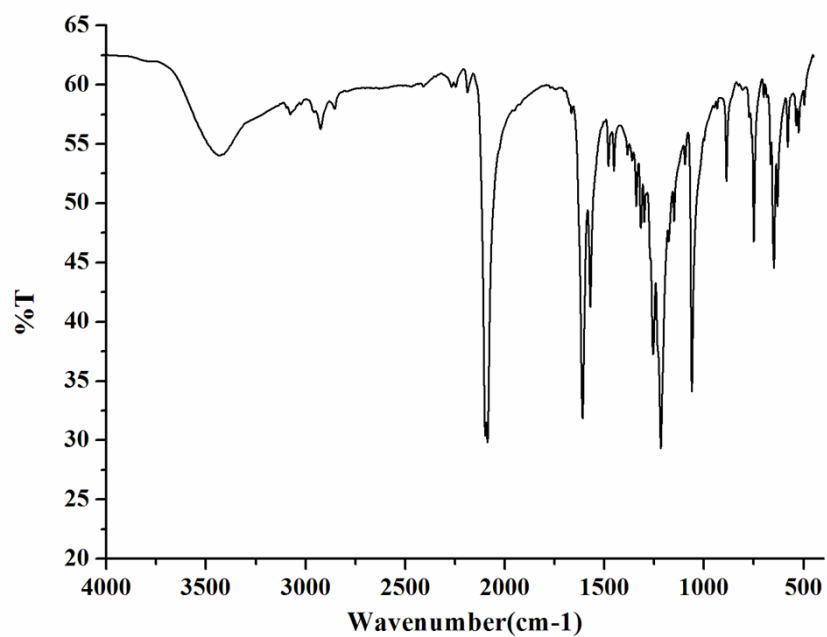

Figure S8: FT-IR spectrum of  $L$  in KBr pellet.

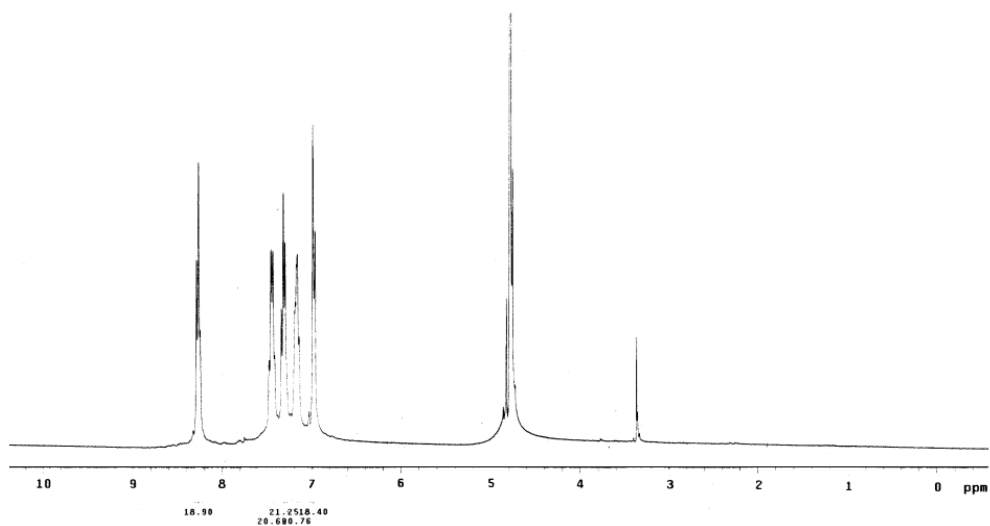

Figure S9:  $^1H$ -NMR spectrum of  $L''$  in  $D_2O$ .

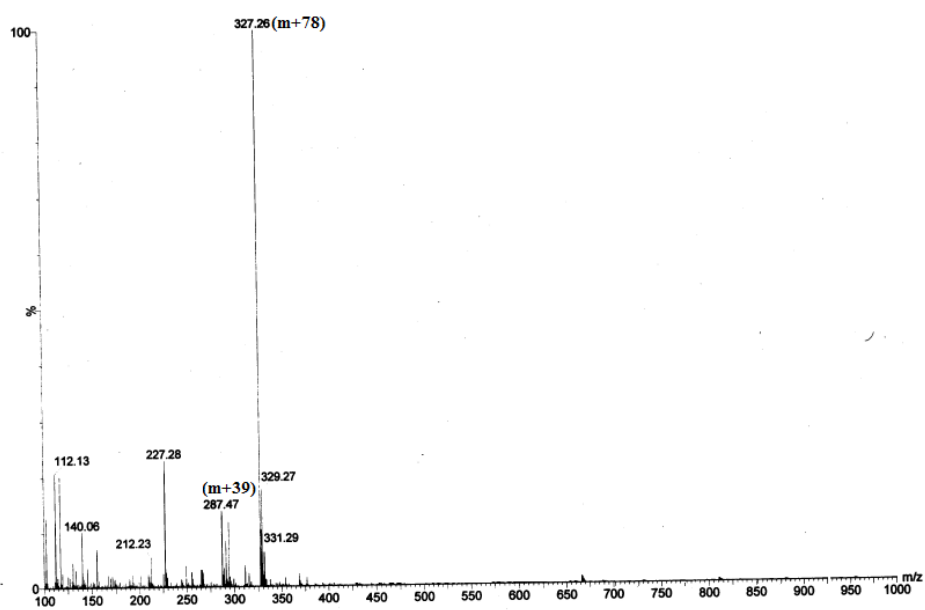

Figure S10: ESI-mass spectrum of  $L''$  in methanol.

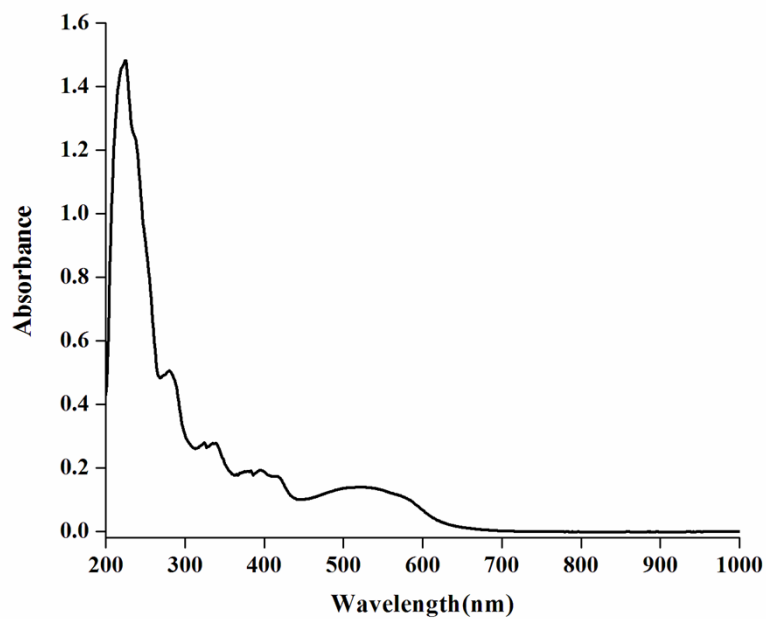

**Figure S11:** UV-visible spectrum of  $L//$  in methanol.

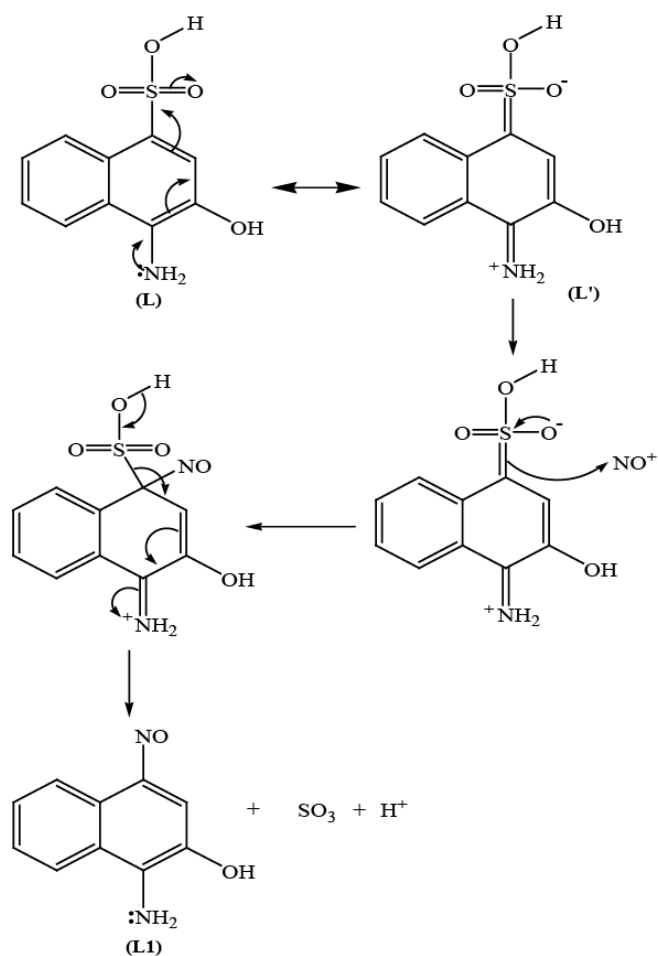

**Scheme.** Most probable mechanism for the desulphonation of the ligand by  $NO^+$ .

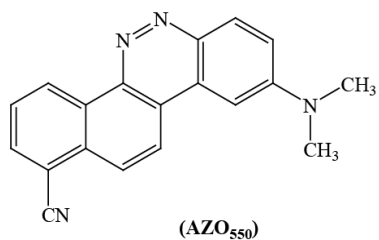

**Figure S12.** AZO<sub>550</sub>

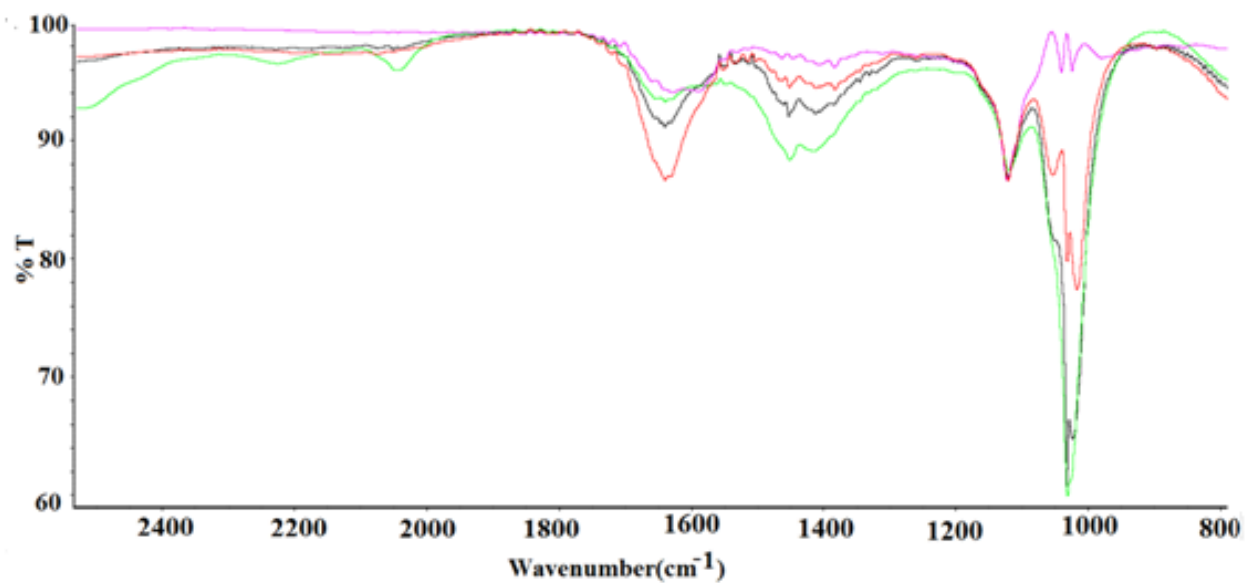

**Figure S13:** Solution FT- IR of [Cu-NO] complex. The band  $\sim 1650\text{ cm}^{-1}$  decays gradually with time indicating the unstable nature of the intermediate (red , immediate after purging NO into the methanol solution of complex **1**; black, after 10 mint; green after, 20 mint and pink, after 30 mint of NO purging).



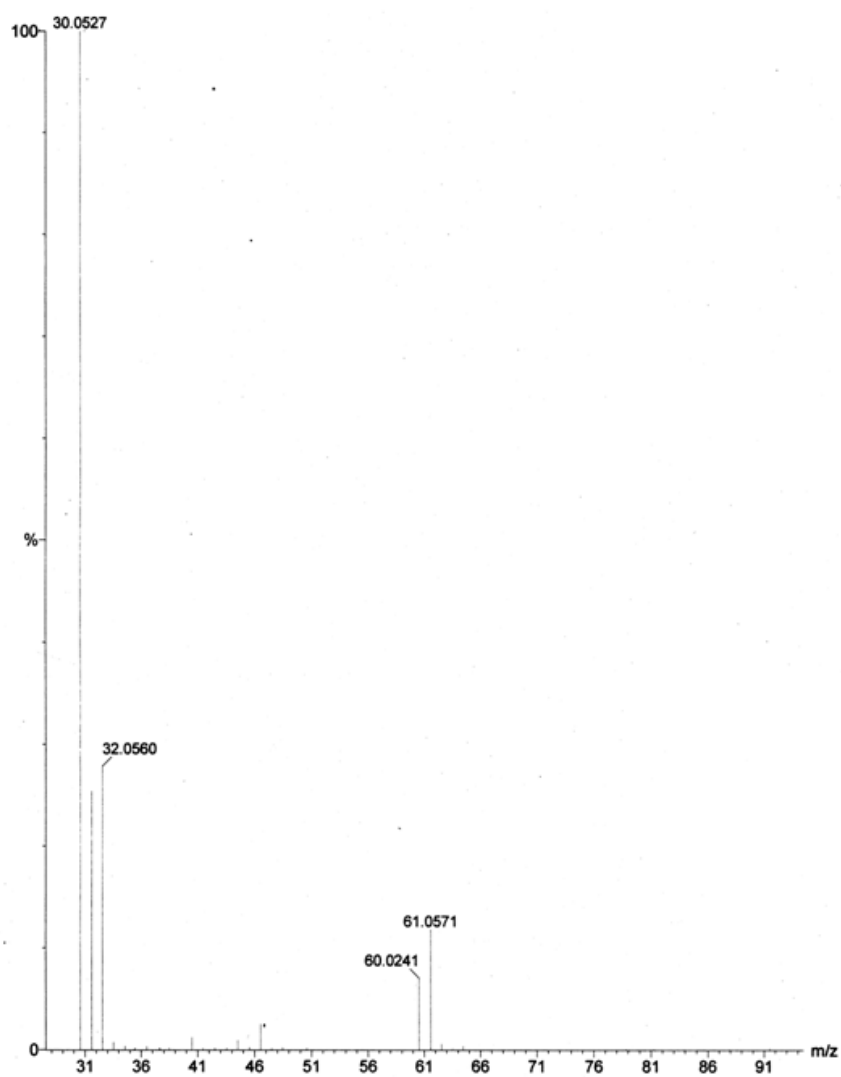

**Figure S14:** GC-Mass spectrum of MeNO<sub>2</sub>.

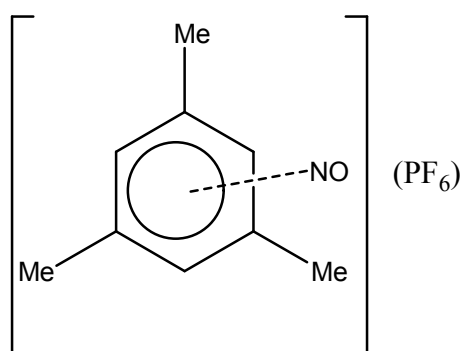

**Figure S15:** [1,3,5-Me<sub>3</sub>C<sub>6</sub>H<sub>3</sub>NO]PF<sub>6</sub>

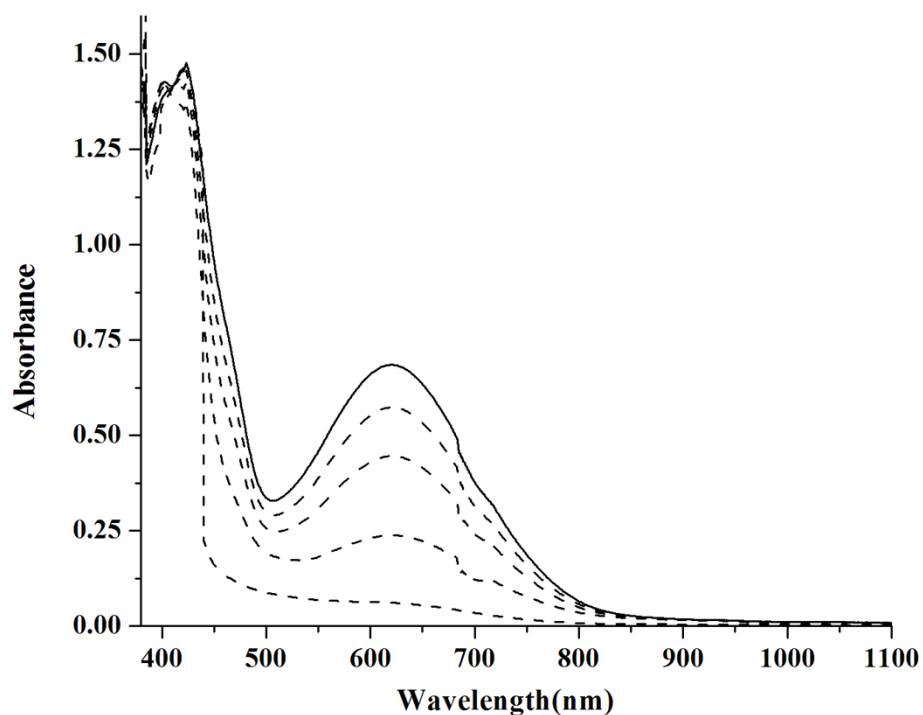

**Figure S16.** UV-Visible spectra of intermediate [Cu<sup>II</sup>-NO] species (solid line) and its decay (dotted line) in methanol. The band at ~430 nm remains even after reduction of the Cu(II) to Cu(I).

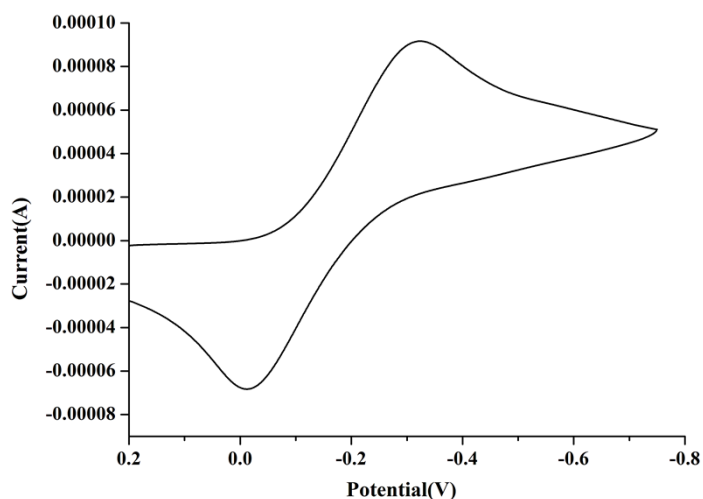

**Figure S17.** Cyclic voltammogram of the complex in methanol with glassy carbon working electrode, Ag/Ag<sup>+</sup> reference electrode, tetrabutylammonium perchlorate (TBAP) supporting electrolyte, scan rate: 0.5 v/s.

## Proposed and isolated Cu(II)-nitrosyl intermediates

| Sl. No. | Ligand                                                                                                      | Cu(II)-nitrosyl | Reference                                        |
|---------|-------------------------------------------------------------------------------------------------------------|-----------------|--------------------------------------------------|
| 1       | 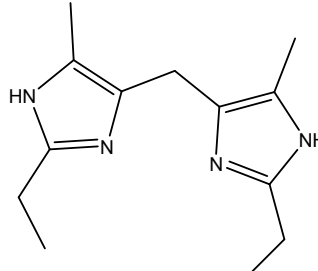                           | Isolated        | <i>Chem. Commun.</i> , <b>2012</b> , 48, 1251    |
| 2       | <br>R = alkyl group        | proposed        | <i>Dalton Trans.</i> , <b>2012</b> , 41, 2927    |
| 3       |                            | proposed        | <i>Inorg. Chem.</i> <b>2011</b> , 50, 3206       |
| 4       |                           | proposed        | <i>Dalton Trans.</i> , <b>2011</b> , 40, 8656    |
| 5       |                          | proposed        | <i>Chem. Commun</i> , <b>2011</b> , 47, 2964     |
| 6       | <br>R = ethyl, isopropyl | proposed        | <i>J. Am. Chem. Soc.</i> <b>2010</b> , 132, 7846 |

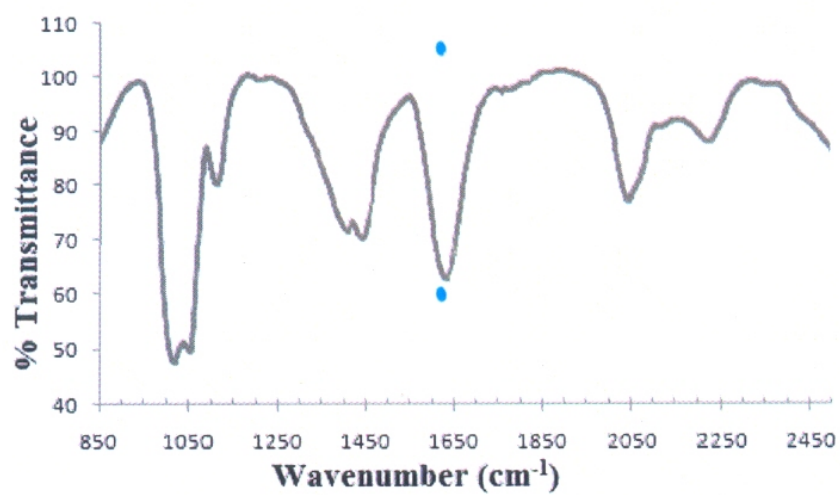

**Figure S18:** Solution FT-IR of the [Cu-NO] intermediate generated from the reaction of the complex with <sup>15</sup>NO in methanol at room temperature.
